# Supplementary material for: Diversity and Distribution of Harmful Algal Bloom Species from Seamount to Coastal Waters in the South China Sea
Source: PubMed Central journal article supplement (PMC10100961; doi:10.1128/spectrum.04169-22), 2023-02-23
Supplement: spectrum.04169-22-s0001.pdf [file spectrum.04169-22-s0001.pdf]

## Supplemental Material FOR Figures

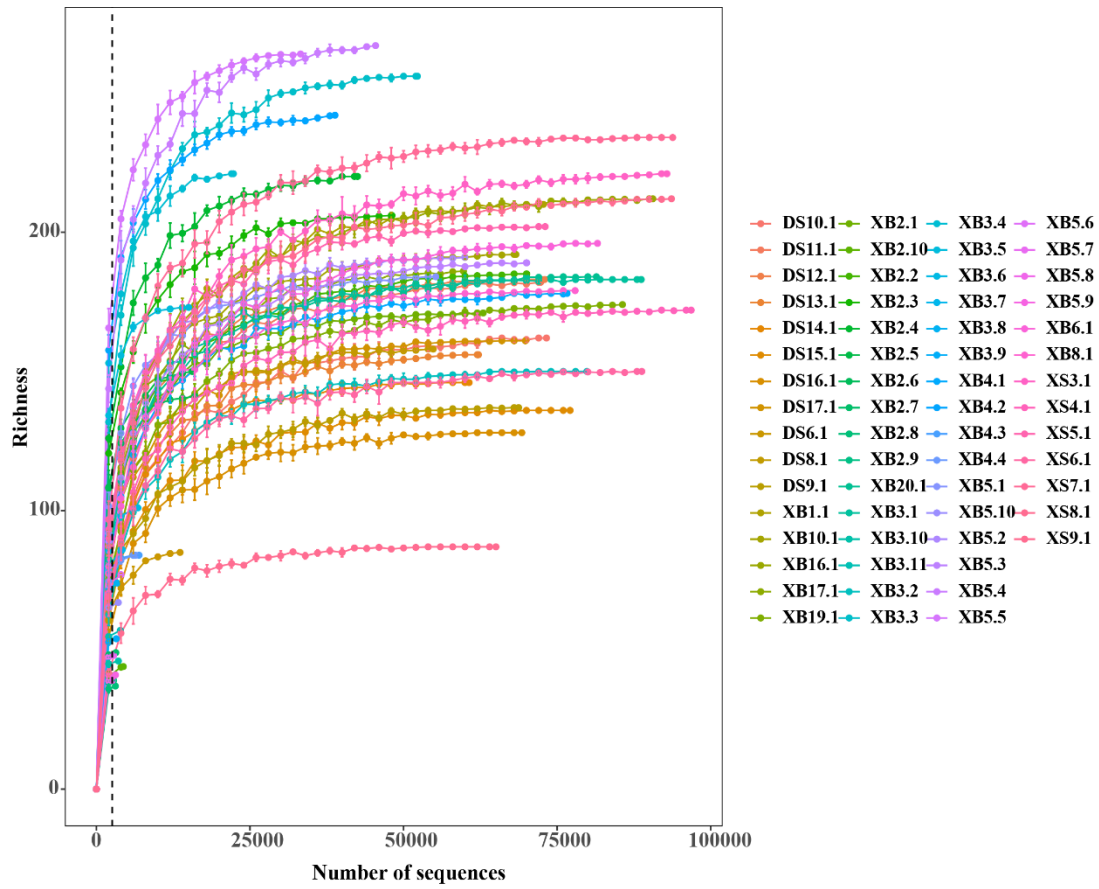

**Fig. S1** Rarefaction curves of ASVs. The curves were drawn based on the abundance of reads from 61 samples.

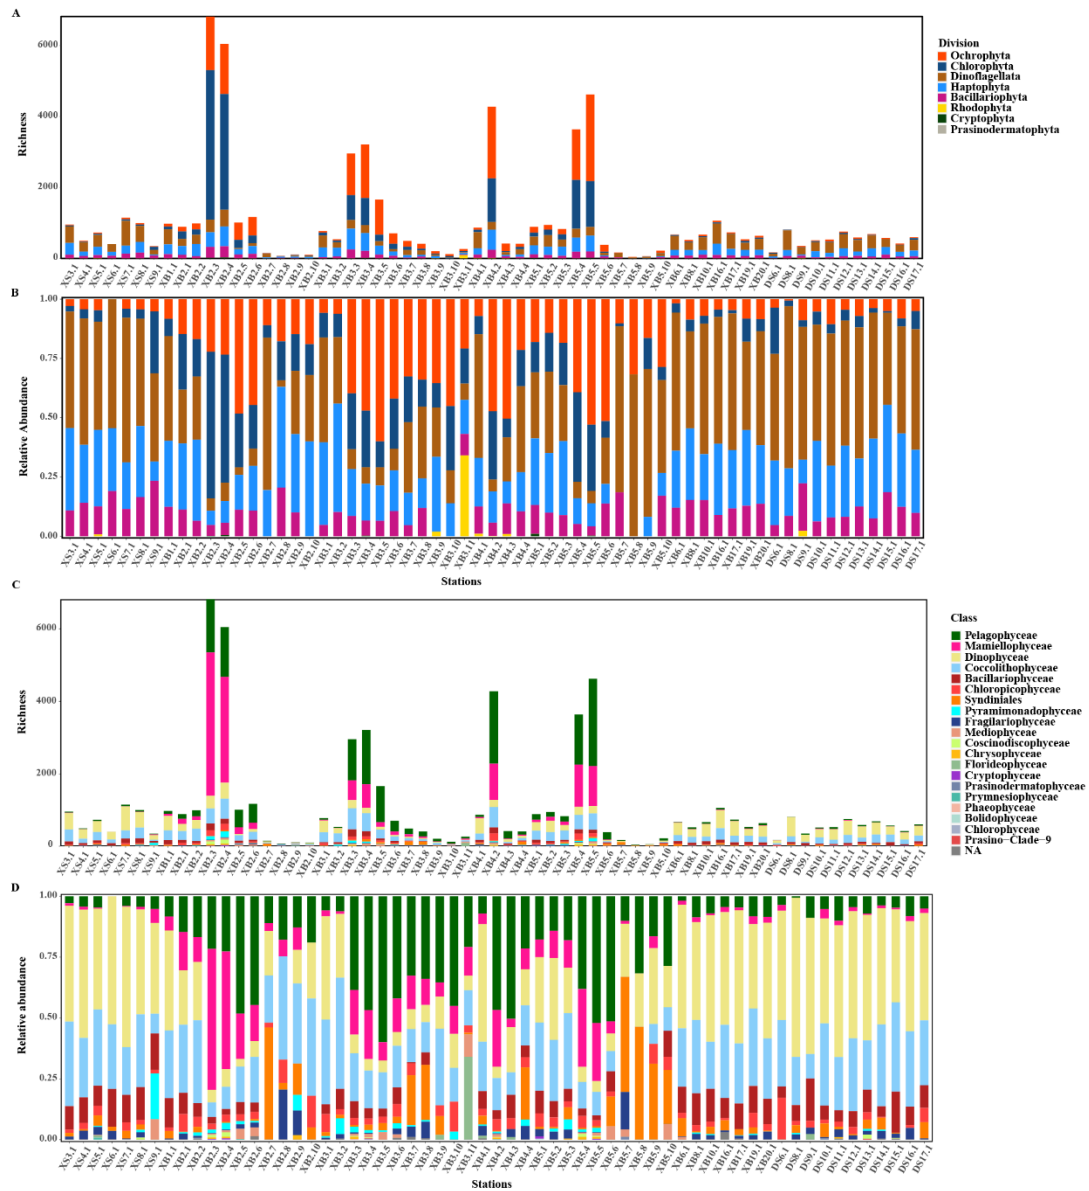

**Fig. S2** Taxonomic classification of eukaryotic algae ASVs retrieved from 61 samples.

(A) and (B) for richness and relative abundance of eukaryotic algae at division-level taxa; (C) and (D) for richness and relative abundance of eukaryotic algae at class-level taxa.

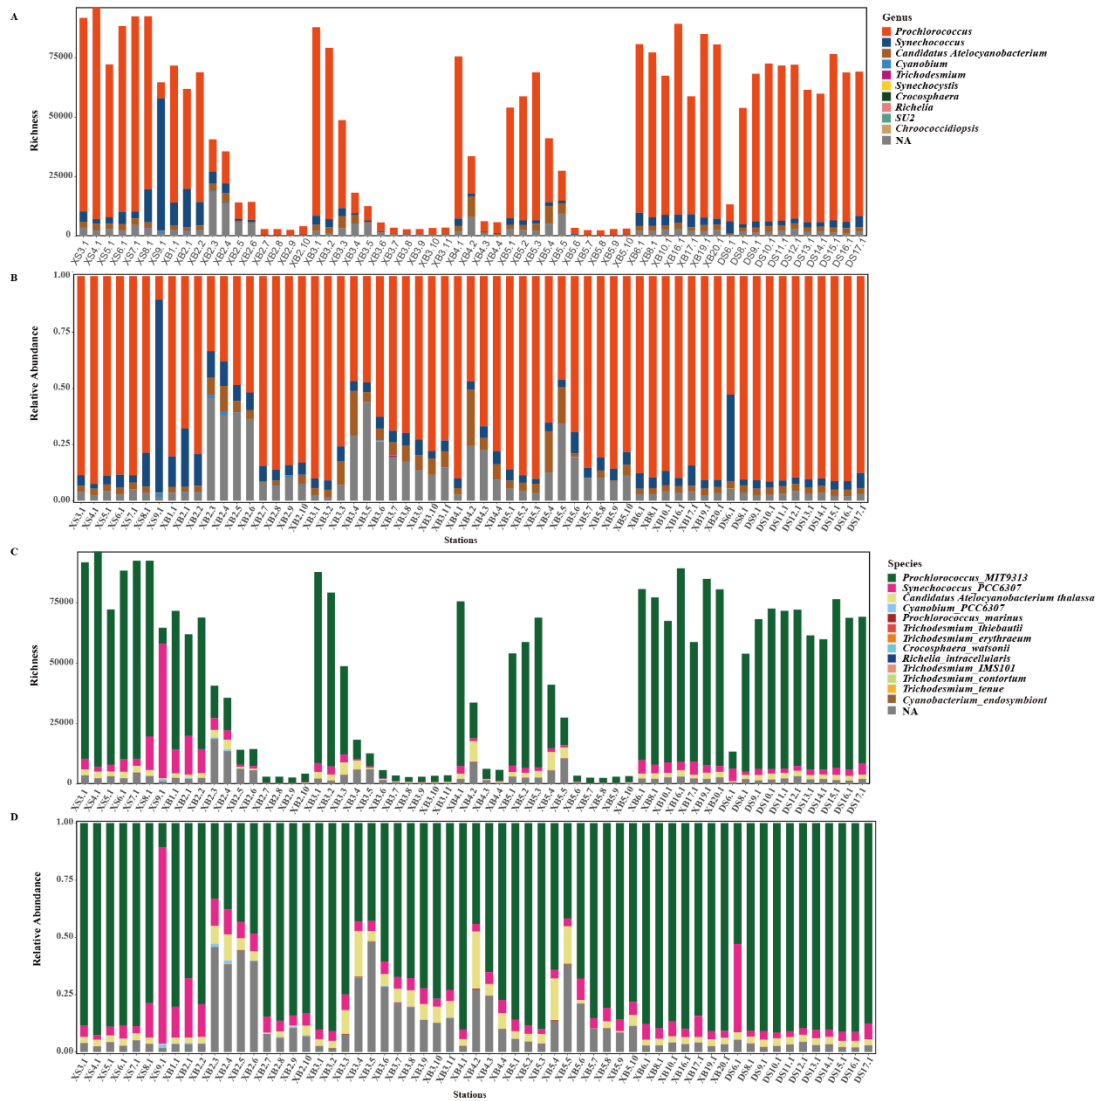

**Fig. S3** Taxonomic classification of Cyanobacteria ASVs retrieved from 61 samples.

(A) and (B) for richness and relative abundance of Cyanobacteria at Genus-level taxa;

(C) and (D) for richness and relative abundance of Cyanobacteria at species-level taxa.

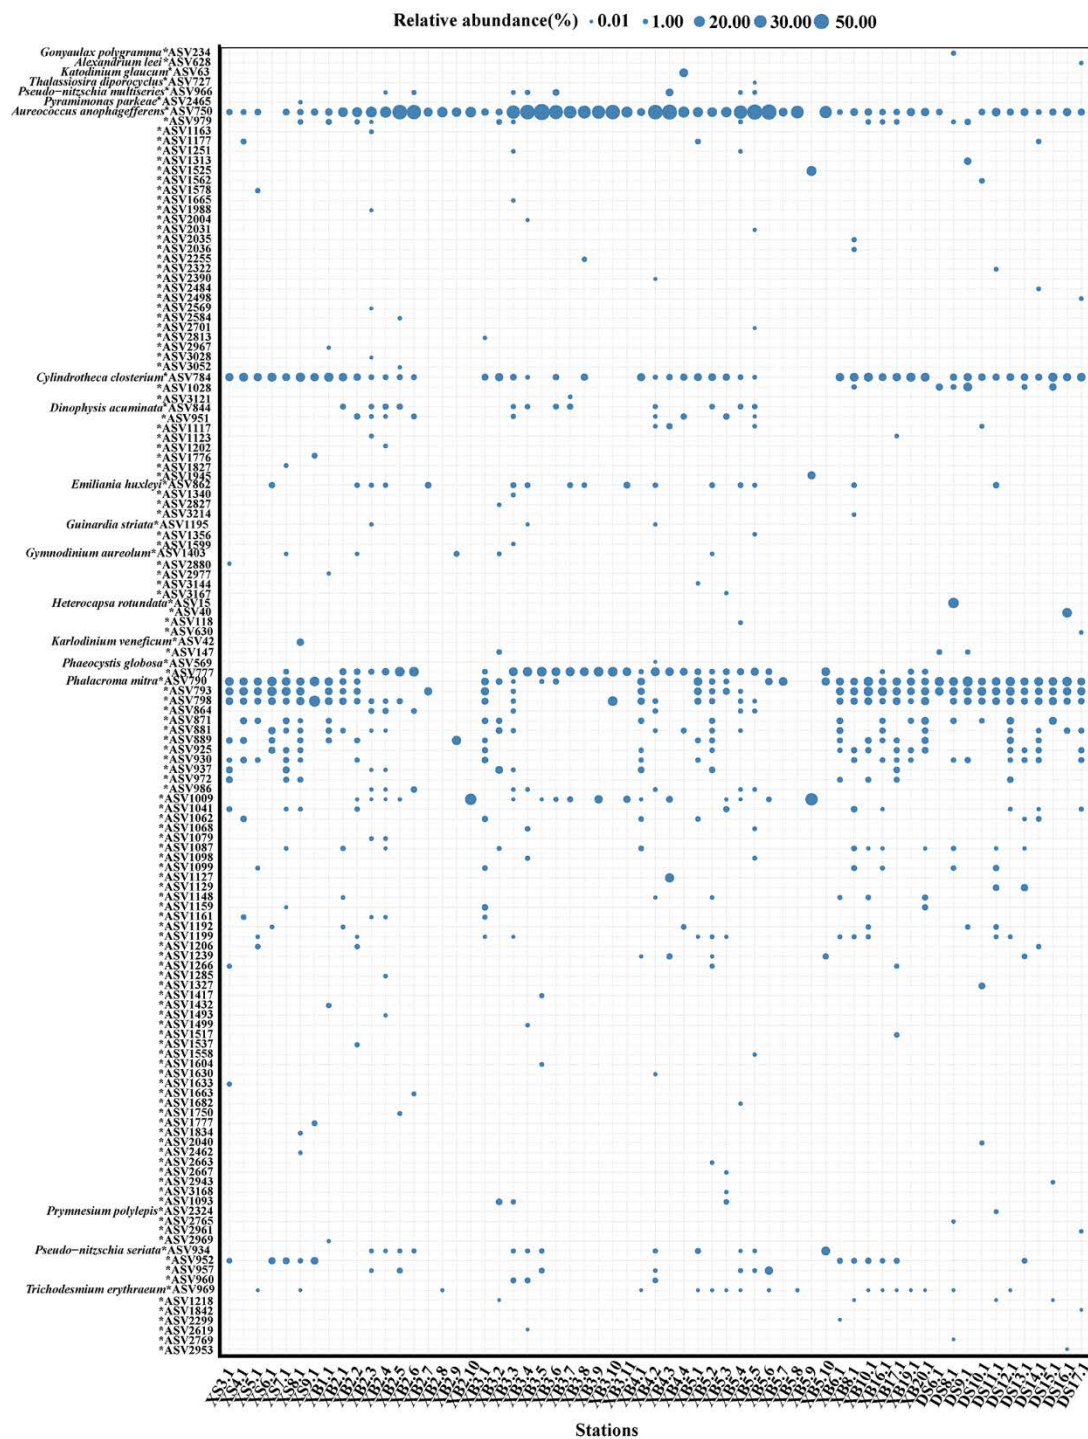

**Fig. S4** Distribution of HAB species by one ASV to one species and multiple ASVs to one species from 61 field samples in the South China Sea (SCS). The size of the blue circle represents the size of the relative abundance.

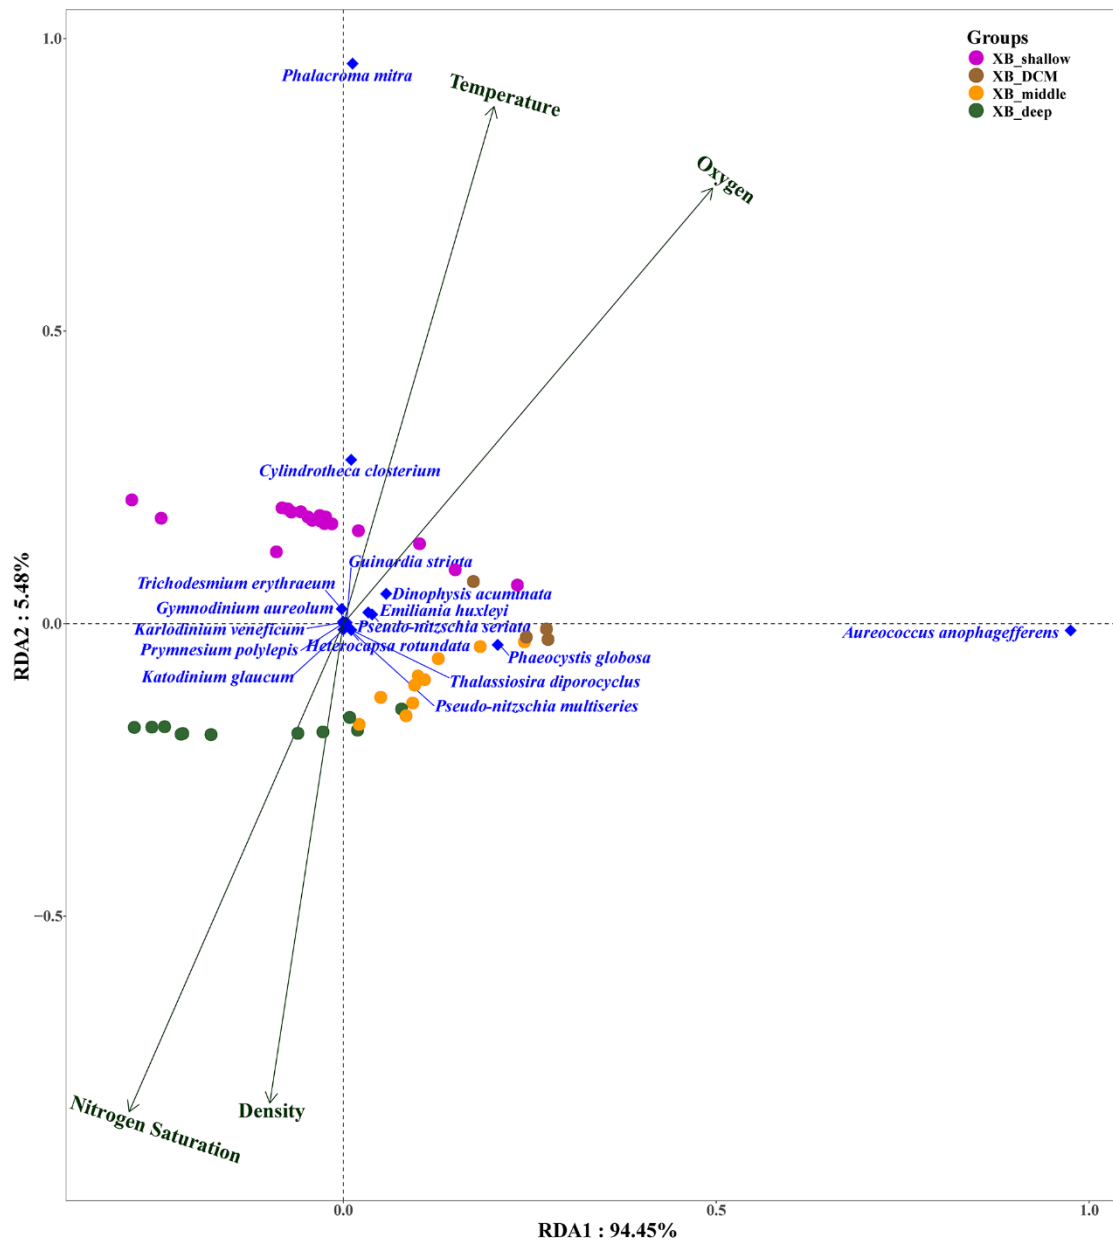

**Fig. S5** Major physicochemical parameters in different samples with the depth gradients from seamount region of Xianbei in the South China Sea (SCS).

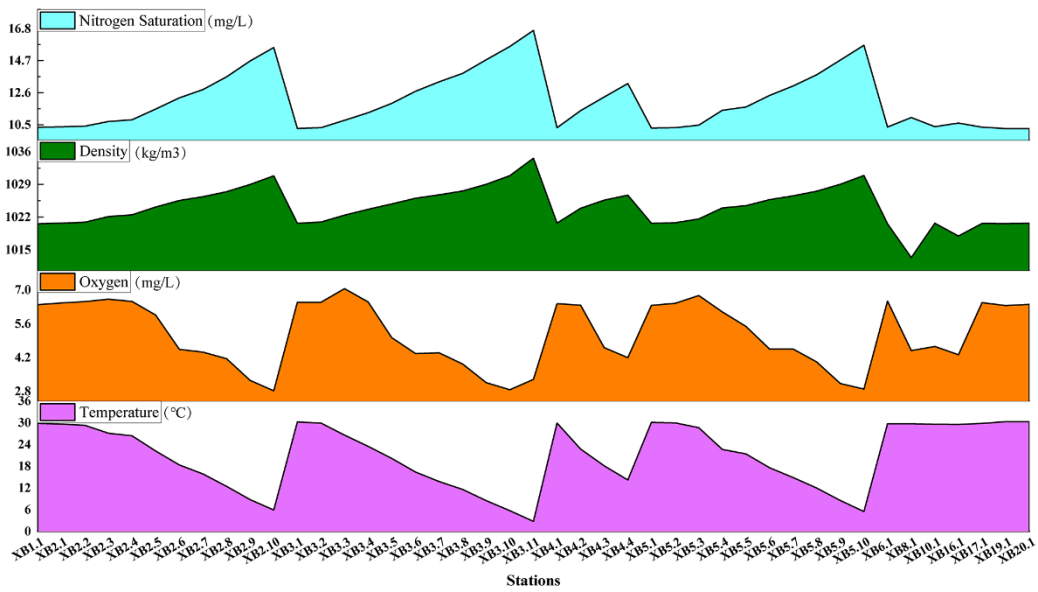

**Fig. S6** Correlations between HAB Species and environmental factors in seamount regions of Xianbei. Redundancy analysis (RDA) analysis for testing the relationship between HAB species and environmental factors. Dots in different colors or shapes represent sample groups in different environments or conditions. Species and environmental factors in the RDA diagram are represented by blue and green arrows, respectively.

## Supplemental Material FOR Tables

**Table S1 The diversity indices for Eukaryotic algae in different samples**

| Samples | Richness | Shannon | Simpson | Pielou | Chao1  | ACE    | goods_coverage |
|---------|----------|---------|---------|--------|--------|--------|----------------|
| XS3.1   | 35.00    | 3.125   | 0.943   | 0.879  | 35.000 | 35.000 | 1.000          |
| XS4.1   | 26.00    | 2.883   | 0.931   | 0.885  | 26.000 | 26.367 | 0.998          |
| XS5.1   | 38.00    | 3.135   | 0.942   | 0.862  | 38.000 | 38.422 | 0.999          |
| XS6.1   | 19.00    | 2.625   | 0.913   | 0.892  | 19.000 | 19.000 | 1.000          |
| XS7.1   | 41.00    | 3.177   | 0.946   | 0.856  | 41.000 | 41.426 | 0.999          |
| XS8.1   | 42.00    | 3.169   | 0.941   | 0.848  | 42.000 | 42.000 | 1.000          |
| XS9.1   | 12.00    | 2.239   | 0.875   | 0.901  | 12.000 | 12.000 | 1.000          |
| XB1.1   | 36.00    | 3.079   | 0.941   | 0.859  | 36.000 | 36.000 | 1.000          |
| XB2.1   | 33.00    | 3.042   | 0.937   | 0.870  | 33.000 | 33.000 | 1.000          |
| XB2.2   | 42.00    | 3.181   | 0.941   | 0.851  | 42.200 | 43.031 | 0.998          |
| XB2.3   | 53.00    | 2.297   | 0.825   | 0.578  | 53.000 | 53.445 | 1.000          |
| XB2.4   | 62.00    | 2.436   | 0.835   | 0.590  | 62.000 | 62.420 | 1.000          |
| XB2.5   | 21.00    | 1.850   | 0.729   | 0.608  | 21.000 | 21.424 | 0.999          |
| XB2.6   | 24.00    | 2.073   | 0.762   | 0.652  | 24.000 | 24.000 | 1.000          |
| XB2.7   | 19.00    | 2.689   | 0.918   | 0.913  | 19.000 | 19.000 | 1.000          |
| XB2.8   | 7.00     | 1.549   | 0.733   | 0.796  | 7.000  | 7.000  | 1.000          |
| XB2.9   | 12.00    | 2.087   | 0.832   | 0.840  | 12.000 | 12.000 | 1.000          |
| XB2.10  | 8.00     | 1.608   | 0.744   | 0.773  | 8.000  | 8.000  | 1.000          |
| XB3.1   | 37.00    | 3.267   | 0.953   | 0.905  | 37.000 | 37.322 | 0.999          |
| XB3.2   | 31.00    | 2.905   | 0.925   | 0.846  | 31.000 | 31.427 | 0.998          |
| XB3.3   | 53.00    | 2.532   | 0.821   | 0.638  | 53.333 | 53.781 | 0.999          |
| XB3.4   | 48.00    | 2.043   | 0.735   | 0.528  | 48.000 | 48.294 | 1.000          |
| XB3.5   | 32.00    | 1.658   | 0.613   | 0.478  | 32.000 | 32.351 | 0.999          |
| XB3.6   | 27.00    | 2.308   | 0.795   | 0.700  | 27.000 | 27.000 | 1.000          |
| XB3.7   | 31.00    | 2.549   | 0.857   | 0.742  | 31.000 | 31.000 | 1.000          |
| XB3.8   | 24.00    | 2.413   | 0.851   | 0.759  | 24.000 | 24.000 | 1.000          |
| XB3.9   | 12.00    | 1.964   | 0.806   | 0.790  | 12.000 | 12.000 | 1.000          |
| XB3.10  | 7.00     | 1.605   | 0.735   | 0.825  | 7.000  | 7.000  | 1.000          |
| XB3.11  | 13.00    | 1.997   | 0.811   | 0.779  | 13.000 | 13.000 | 1.000          |
| XB4.1   | 40.00    | 3.143   | 0.936   | 0.852  | 40.167 | 40.979 | 0.998          |
| XB4.2   | 40.00    | 1.965   | 0.731   | 0.533  | 40.000 | 40.000 | 1.000          |
| XB4.3   | 12.00    | 1.773   | 0.713   | 0.713  | 12.000 | 12.000 | 1.000          |
| XB4.4   | 24.00    | 2.711   | 0.908   | 0.853  | 24.000 | 24.000 | 1.000          |
| XB5.1   | 37.00    | 3.124   | 0.938   | 0.865  | 37.000 | 37.438 | 0.999          |
| XB5.2   | 37.00    | 3.146   | 0.940   | 0.871  | 37.000 | 37.323 | 0.999          |
| XB5.3   | 39.00    | 2.969   | 0.924   | 0.810  | 39.111 | 39.861 | 0.998          |
| XB5.4   | 52.00    | 2.317   | 0.788   | 0.586  | 52.000 | 52.000 | 1.000          |
| XB5.5   | 52.00    | 1.849   | 0.679   | 0.468  | 52.000 | 52.000 | 1.000          |

|        |       |       |       |       |        |        |       |
|--------|-------|-------|-------|-------|--------|--------|-------|
| XB5.6  | 16.00 | 1.869 | 0.711 | 0.674 | 16.000 | 16.000 | 1.000 |
| XB5.7  | 14.00 | 2.340 | 0.887 | 0.887 | 14.000 | 14.000 | 1.000 |
| XB5.8  | 5.00  | 1.490 | 0.760 | 0.926 | 5.000  | 5.000  | 1.000 |
| XB5.9  | 6.00  | 1.581 | 0.763 | 0.883 | 6.000  | 6.000  | 1.000 |
| XB5.10 | 16.00 | 2.370 | 0.869 | 0.855 | 16.000 | 16.000 | 1.000 |
| XB6.1  | 37.00 | 3.070 | 0.933 | 0.850 | 37.000 | 37.000 | 1.000 |
| XB8.1  | 35.00 | 3.198 | 0.949 | 0.899 | 35.000 | 35.000 | 1.000 |
| XB10.1 | 35.00 | 2.972 | 0.929 | 0.836 | 35.000 | 35.416 | 0.999 |
| XB16.1 | 43.00 | 3.225 | 0.947 | 0.857 | 43.000 | 43.428 | 0.999 |
| XB17.1 | 35.00 | 3.171 | 0.946 | 0.892 | 35.000 | 35.000 | 1.000 |
| XB19.1 | 26.00 | 2.931 | 0.933 | 0.900 | 26.000 | 26.000 | 1.000 |
| XB20.1 | 30.00 | 3.052 | 0.943 | 0.897 | 30.500 | 30.917 | 0.997 |
| DS6.1  | 11.00 | 2.161 | 0.864 | 0.901 | 11.000 | 11.000 | 1.000 |
| DS8.1  | 39.00 | 3.054 | 0.928 | 0.834 | 39.000 | 39.000 | 1.000 |
| DS9.1  | 15.00 | 2.405 | 0.889 | 0.888 | 15.000 | 15.000 | 1.000 |
| DS10.1 | 31.00 | 3.045 | 0.941 | 0.887 | 31.000 | 31.000 | 1.000 |
| DS11.1 | 34.00 | 3.041 | 0.938 | 0.862 | 34.000 | 34.308 | 0.998 |
| DS12.1 | 30.00 | 3.030 | 0.939 | 0.891 | 30.000 | 30.000 | 1.000 |
| DS13.1 | 35.00 | 3.066 | 0.933 | 0.862 | 35.000 | 35.361 | 0.998 |
| DS14.1 | 38.00 | 3.118 | 0.940 | 0.857 | 38.000 | 38.553 | 0.999 |
| DS15.1 | 24.00 | 2.802 | 0.930 | 0.882 | 24.000 | 24.000 | 1.000 |
| DS16.1 | 18.00 | 2.631 | 0.917 | 0.910 | 18.000 | 18.000 | 1.000 |
| DS17.1 | 38.00 | 3.067 | 0.933 | 0.843 | 38.000 | 38.000 | 1.000 |

**Table S2 The diversity indices for Cyanobacteria in different samples**

| <b>Samples</b> | <b>Richness</b> | <b>Shannon</b> | <b>Simpson</b> | <b>Pielou</b> | <b>Chao1</b> | <b>ACE</b> | <b>goods_coverage</b> |
|----------------|-----------------|----------------|----------------|---------------|--------------|------------|-----------------------|
| XS3.1          | 172.00          | 1.527          | 0.540          | 0.297         | 172.188      | 172.916    | 1.000                 |
| XS4.1          | 138.00          | 1.281          | 0.467          | 0.260         | 138.125      | 138.502    | 1.000                 |
| XS5.1          | 157.00          | 1.456          | 0.505          | 0.288         | 157.000      | 157.317    | 1.000                 |
| XS6.1          | 126.00          | 1.418          | 0.518          | 0.293         | 126.333      | 127.016    | 1.000                 |
| XS7.1          | 183.00          | 1.510          | 0.507          | 0.290         | 183.000      | 183.000    | 1.000                 |
| XS8.1          | 161.00          | 1.637          | 0.613          | 0.322         | 161.769      | 162.793    | 1.000                 |
| XS9.1          | 72.00           | 1.054          | 0.393          | 0.247         | 72.000       | 72.000     | 1.000                 |
| XB1.1          | 162.00          | 1.661          | 0.625          | 0.326         | 162.214      | 163.000    | 1.000                 |
| XB2.1          | 129.00          | 1.794          | 0.687          | 0.369         | 129.429      | 129.957    | 1.000                 |
| XB2.2          | 135.00          | 1.679          | 0.625          | 0.342         | 135.000      | 135.340    | 1.000                 |
| XB2.3          | 143.00          | 2.535          | 0.828          | 0.511         | 143.000      | 143.368    | 1.000                 |
| XB2.4          | 146.00          | 2.675          | 0.861          | 0.537         | 146.077      | 146.602    | 1.000                 |
| XB2.5          | 120.00          | 3.169          | 0.911          | 0.662         | 120.000      | 120.000    | 1.000                 |
| XB2.6          | 110.00          | 3.083          | 0.905          | 0.656         | 110.000      | 110.296    | 1.000                 |
| XB2.7          | 28.00           | 1.307          | 0.545          | 0.392         | 28.000       | 28.000     | 1.000                 |
| XB2.8          | 27.00           | 1.386          | 0.556          | 0.421         | 27.000       | 27.000     | 1.000                 |
| XB2.9          | 27.00           | 1.346          | 0.543          | 0.408         | 27.000       | 27.000     | 1.000                 |
| XB2.10         | 34.00           | 1.409          | 0.554          | 0.400         | 34.000       | 34.000     | 1.000                 |



---

|        |        |       |       |       |         |         |       |
|--------|--------|-------|-------|-------|---------|---------|-------|
| XB3.1  | 138.00 | 1.376 | 0.496 | 0.279 | 138.000 | 138.000 | 1.000 |
| XB3.2  | 113.00 | 1.410 | 0.535 | 0.298 | 113.000 | 113.000 | 1.000 |
| XB3.3  | 188.00 | 2.579 | 0.791 | 0.493 | 188.067 | 188.533 | 1.000 |
| XB3.4  | 163.00 | 3.537 | 0.945 | 0.694 | 163.214 | 163.975 | 1.000 |
| XB3.5  | 132.00 | 3.372 | 0.921 | 0.691 | 132.000 | 132.000 | 1.000 |
| XB3.6  | 67.00  | 2.750 | 0.867 | 0.654 | 67.750  | 68.010  | 0.999 |
| XB3.7  | 48.00  | 2.460 | 0.813 | 0.636 | 48.000  | 48.000  | 1.000 |
| XB3.8  | 49.00  | 2.362 | 0.803 | 0.607 | 49.000  | 49.000  | 1.000 |
| XB3.9  | 41.00  | 2.172 | 0.750 | 0.585 | 41.000  | 41.331  | 1.000 |
| XB3.10 | 37.00  | 1.967 | 0.700 | 0.545 | 37.000  | 37.000  | 1.000 |
| XB3.11 | 42.00  | 2.147 | 0.733 | 0.574 | 42.000  | 42.000  | 1.000 |
| XB4.1  | 131.00 | 1.364 | 0.492 | 0.280 | 131.429 | 131.954 | 1.000 |
| XB4.2  | 185.00 | 3.528 | 0.943 | 0.676 | 186.000 | 186.962 | 1.000 |
| XB4.3  | 67.00  | 2.656 | 0.832 | 0.632 | 67.000  | 67.000  | 1.000 |
| XB4.4  | 56.00  | 1.999 | 0.684 | 0.497 | 56.000  | 56.000  | 1.000 |
| XB5.1  | 138.00 | 1.622 | 0.543 | 0.329 | 138.333 | 139.103 | 1.000 |
| XB5.2  | 141.00 | 1.486 | 0.509 | 0.300 | 141.063 | 141.744 | 1.000 |
| XB5.3  | 138.00 | 1.579 | 0.563 | 0.320 | 138.125 | 138.631 | 1.000 |
| XB5.4  | 199.00 | 3.099 | 0.886 | 0.585 | 199.625 | 200.879 | 1.000 |
| XB5.5  | 194.00 | 3.672 | 0.952 | 0.697 | 194.000 | 194.317 | 1.000 |
| XB5.6  | 55.00  | 2.272 | 0.788 | 0.567 | 55.000  | 55.000  | 1.000 |
| XB5.7  | 33.00  | 1.388 | 0.534 | 0.397 | 33.000  | 33.000  | 1.000 |
| XB5.8  | 32.00  | 1.494 | 0.578 | 0.431 | 32.000  | 32.000  | 1.000 |
| XB5.9  | 31.00  | 1.358 | 0.527 | 0.395 | 31.000  | 31.000  | 1.000 |
| XB5.10 | 44.00  | 1.909 | 0.652 | 0.505 | 44.000  | 44.000  | 1.000 |
| XB6.1  | 150.00 | 1.503 | 0.557 | 0.300 | 150.059 | 150.660 | 1.000 |
| XB8.1  | 136.00 | 1.422 | 0.520 | 0.290 | 136.000 | 136.331 | 1.000 |
| XB10.1 | 150.00 | 1.517 | 0.542 | 0.303 | 150.273 | 150.933 | 1.000 |
| XB16.1 | 159.00 | 1.429 | 0.508 | 0.282 | 159.375 | 159.841 | 1.000 |
| XB17.1 | 141.00 | 1.580 | 0.581 | 0.319 | 142.000 | 143.503 | 1.000 |
| XB19.1 | 139.00 | 1.337 | 0.482 | 0.271 | 139.714 | 141.092 | 1.000 |
| XB20.1 | 146.00 | 1.373 | 0.485 | 0.276 | 146.000 | 146.353 | 1.000 |
| DS6.1  | 70.00  | 1.815 | 0.713 | 0.427 | 70.000  | 70.372  | 1.000 |
| DS8.1  | 115.00 | 1.387 | 0.502 | 0.292 | 115.077 | 115.719 | 1.000 |
| DS9.1  | 118.00 | 1.341 | 0.506 | 0.281 | 118.000 | 118.345 | 1.000 |
| DS10.1 | 122.00 | 1.372 | 0.510 | 0.286 | 122.769 | 123.677 | 1.000 |
| DS11.1 | 142.00 | 1.380 | 0.492 | 0.278 | 142.125 | 142.515 | 1.000 |
| DS12.1 | 145.00 | 1.405 | 0.486 | 0.282 | 145.000 | 145.285 | 1.000 |
| DS13.1 | 116.00 | 1.356 | 0.493 | 0.285 | 116.083 | 116.791 | 1.000 |
| DS14.1 | 103.00 | 1.417 | 0.506 | 0.306 | 103.000 | 103.000 | 1.000 |
| DS15.1 | 108.00 | 1.227 | 0.452 | 0.262 | 108.000 | 108.286 | 1.000 |
| DS16.1 | 104.00 | 1.216 | 0.453 | 0.262 | 104.000 | 104.327 | 1.000 |
| DS17.1 | 117.00 | 1.420 | 0.525 | 0.298 | 117.000 | 117.000 | 1.000 |

---

**Table S3 Major physicochemical parameters in different sampling stations from seamount region of Xianbei**

| Stations | Depth (m) | Longitude (°E) | Latitude (°N) | Temperature (°C) | Oxygen (mg/L) | Density (Kg/m <sup>3</sup> ) | Nitrogen Saturation (mg/L) |
|----------|-----------|----------------|---------------|------------------|---------------|------------------------------|----------------------------|
| XB1.1    | -5        | 116.83         | 16.89         | 29.79            | 6.38          | 1020.58                      | 10.34                      |
| XB2.1    | -5        | 116.79         | 16.77         | 29.64            | 6.46          | 1020.71                      | 10.36                      |
| XB2.2    | -25       | 116.79         | 16.77         | 29.3             | 6.52          | 1020.9                       | 10.41                      |
| XB2.3    | -50       | 116.79         | 16.77         | 27.11            | 6.62          | 1022.12                      | 10.71                      |
| XB2.4    | -60       | 116.79         | 16.77         | 26.36            | 6.52          | 1022.48                      | 10.82                      |
| XB2.5    | -100      | 116.79         | 16.77         | 22.18            | 5.96          | 1024.15                      | 11.52                      |
| XB2.6    | -150      | 116.79         | 16.77         | 18.32            | 4.54          | 1025.55                      | 12.26                      |
| XB2.7    | -200      | 116.79         | 16.77         | 15.85            | 4.42          | 1026.35                      | 12.8                       |
| XB2.8    | -300      | 116.79         | 16.77         | 12.44            | 4.15          | 1027.44                      | 13.64                      |
| XB2.9    | -500      | 116.79         | 16.77         | 8.75             | 3.25          | 1028.98                      | 14.68                      |
| XB2.10   | -800      | 116.79         | 16.77         | 5.92             | 2.82          | 1030.83                      | 15.56                      |
| XB3.1    | -5        | 116.75         | 16.69         | 30.19            | 6.49          | 1020.69                      | 10.26                      |
| XB3.2    | -25       | 116.75         | 16.69         | 29.89            | 6.48          | 1020.92                      | 10.3                       |
| XB3.3    | -50       | 116.75         | 16.69         | 26.57            | 7.05          | 1022.41                      | 10.79                      |
| XB3.4    | -75       | 116.75         | 16.69         | 23.48            | 6.5           | 1023.68                      | 11.29                      |
| XB3.5    | -100      | 116.75         | 16.69         | 20.15            | 5.02          | 1024.81                      | 11.9                       |
| XB3.6    | -150      | 116.75         | 16.69         | 16.38            | 4.37          | 1026.02                      | 12.68                      |
| XB3.7    | -200      | 116.75         | 16.69         | 13.74            | 4.39          | 1026.76                      | 13.31                      |
| XB3.8    | -300      | 116.75         | 16.69         | 11.59            | 3.93          | 1027.59                      | 13.87                      |
| XB3.9    | -500      | 116.75         | 16.69         | 8.46             | 3.15          | 1029.03                      | 14.76                      |
| XB3.10   | -800      | 116.75         | 16.69         | 5.73             | 2.86          | 1030.86                      | 15.63                      |
| XB3.11   | -1500     | 116.75         | 16.69         | 2.77             | 3.3           | 1034.57                      | 16.68                      |
| XB4.1    | -5        | 116.72         | 16.62         | 29.92            | 6.43          | 1020.7                       | 10.31                      |
| XB4.2    | -80       | 116.72         | 16.62         | 22.73            | 6.36          | 1023.88                      | 11.42                      |
| XB4.3    | -150      | 116.72         | 16.62         | 18.08            | 4.61          | 1025.62                      | 12.31                      |
| XB4.4    | -200      | 116.72         | 16.62         | 14.17            | 4.19          | 1026.68                      | 13.2                       |
| XB5.1    | -5        | 116.69         | 16.55         | 30.1             | 6.36          | 1020.68                      | 10.28                      |
| XB5.2    | -25       | 116.69         | 16.55         | 29.97            | 6.44          | 1020.8                       | 10.3                       |
| XB5.3    | -50       | 116.69         | 16.55         | 28.62            | 6.77          | 1021.62                      | 10.48                      |
| XB5.4    | -90       | 116.69         | 16.55         | 22.61            | 6.09          | 1023.96                      | 11.44                      |
| XB5.5    | -100      | 116.69         | 16.55         | 21.4             | 5.48          | 1024.45                      | 11.66                      |
| XB5.6    | -150      | 116.69         | 16.55         | 17.59            | 4.55          | 1025.74                      | 12.42                      |
| XB5.7    | -200      | 116.69         | 16.55         | 14.85            | 4.55          | 1026.56                      | 13.04                      |
| XB5.8    | -300      | 116.69         | 16.55         | 11.95            | 4.02          | 1027.52                      | 13.77                      |
| XB5.9    | -500      | 116.69         | 16.55         | 8.53             | 3.12          | 1029.01                      | 14.74                      |
| XB5.10   | -800      | 116.69         | 16.55         | 5.49             | 2.89          | 1030.9                       | 15.71                      |
| XB6.1    | -5        | 116.65         | 16.47         | 29.73            | 6.53          | 1020.58                      | 10.35                      |
| XB8.1    | -5        | 116.57         | 16.32         | 29.73            | 4.49          | 1013.35                      | 10.97                      |

|        |    |        |       |       |      |         |       |
|--------|----|--------|-------|-------|------|---------|-------|
| XB10.1 | -5 | 116.48 | 16.17 | 29.57 | 4.66 | 1020.68 | 10.37 |
| XB16.1 | -5 | 117.02 | 16.58 | 29.51 | 4.31 | 1017.94 | 10.61 |
| XB17.1 | -5 | 116.87 | 16.62 | 29.79 | 6.47 | 1020.64 | 10.34 |
| XB19.1 | -5 | 116.65 | 16.68 | 30.31 | 6.35 | 1020.61 | 10.25 |
| XB20.1 | -5 | 116.27 | 16.8  | 30.28 | 6.4  | 1020.67 | 10.25 |

---
